# Supplementary material for: High-Throughput Sequencing Analysis of Small RNAs Derived from Coleus Blumei Viroids
Source: PubMed Central journal article supplement (PMC6669434; doi:10.3390/v11070619), 2019-07-05
Supplement: viruses-11-00619-s001.pdf [file viruses-11-00619-s001.pdf]

## Supporting information

**Table S1. Quality control of sRNA sequencing data**

| Sample  | Raw reads<br>(M) | Minimum<br>length (nt) | Maximum<br>length (nt) | Average<br>length (nt) | Q20 (%) | G/C<br>content<br>(%) |
|---------|------------------|------------------------|------------------------|------------------------|---------|-----------------------|
| CbVd-1  | 20.11            | 10                     | 50                     | 22.47                  | 99.58   | 46.67                 |
| CbVd-5  | 20.57            | 10                     | 50                     | 22.35                  | 99.59   | 47.70                 |
| CbVd-6  | 16.55            | 10                     | 50                     | 22.39                  | 99.58   | 47.91                 |
| CbVds * | 18.57            | 10                     | 50                     | 22.74                  | 99.65   | 48.98                 |

\* from coleus plant doubly infected with CbVd-1 and -5.
